# Supplementary material
Source: Springer Nature journal article supplement (https://www.springermedizin.de/resource/supplementary/12967_2006_166_MOESM4_ESM.pdf/9575974)

**1****2****3****4****5****6****XIAP**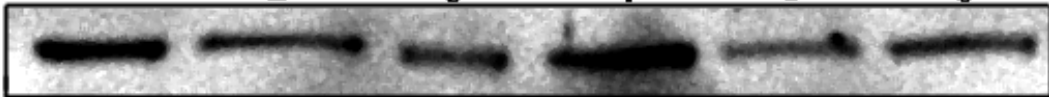**p45****Actin**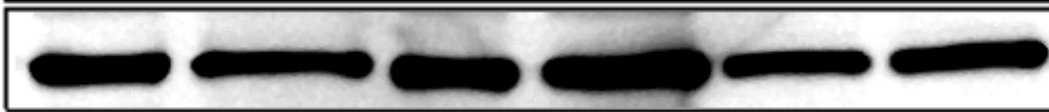**p48**

Supplement: MOESM4 [file 9575974]
